# Nanoscale organization of ryanodine receptor distribution and phosphorylation pattern determines the dynamics of calcium sparks

<sup>1</sup>M. Hernández Mesa, <sup>1</sup>J. van den Brink, <sup>2,3</sup>W.E. Louch, <sup>1</sup>K.J. McCabe, <sup>4</sup>P. Rangamani\*

<sup>1</sup>Department of Computational Physiology, Simula Research Laboratory, Fornebu, Norway

<sup>2</sup>Institute for Experimental Medical Research, Oslo University Hospital and University of Oslo, Oslo, Norway

<sup>3</sup>K.G. Jebsen Center for Cardiac Research, University of Oslo, Oslo, Norway

<sup>4</sup>Department of Mechanical and Aerospace Engineering, University of California San Diego, La Jolla CA 92093, USA.

\*To whom correspondence must be addressed: [prangamani@ucsd.edu](mailto:prangamani@ucsd.edu)

## Abstract

Super-resolution imaging techniques have provided a better understanding of the relationship between the nanoscale organization of function of ryanodine receptors (RyRs) in cardiomyocytes. Interestingly recent data have indicated that this relationship is disrupted in heart failure (HF), as RyRs are dispersed into smaller and more numerous clusters. However, RyRs are also hyperphosphorylated in this condition, and this is reported to occur preferentially within the cluster centre. Thus, the combined impact of RyR relocalization and sensitization on  $\text{Ca}^{2+}$  spark generation in failing cardiomyocytes is likely complex and these observations suggest that both the nanoscale organization of RyRs and the pattern of phosphorylated RyRs within clusters could be critical determinants of  $\text{Ca}^{2+}$  spark dynamics. To test this hypothesis, we used computational modeling to quantify the relationships between RyR cluster geometry, phosphorylation patterns, and sarcoplasmic reticulum (SR)  $\text{Ca}^{2+}$  release. We found that RyR cluster disruption results in a decrease in spark fidelity and longer sparks with a lower amplitude. Phosphorylation of some RyRs within the cluster can play a compensatory role, recovering healthy spark dynamics. Interestingly, our model predicts that such compensation is critically dependent on the phosphorylation pattern, as phosphorylation localized within the cluster center resulted in longer  $\text{Ca}^{2+}$  sparks and higher spark fidelity compared to a uniformly distributed phosphorylation pattern. Our results strongly suggest that both the phosphorylation pattern and nanoscale RyR reorganization are critical determinants of  $\text{Ca}^{2+}$  dynamics in HF.

## Abbreviations:

excitation-contraction coupling (ECC); sarcoplasmic reticulum (SR); ryanodine receptors (RyRs); SR  $\text{Ca}^{2+}$ -ATPase (SERCA); protein Kinase A (PKA);  $\text{Ca}^{2+}$  calmodulin kinase type II (CaMKII); junctional SR (jSR); non-junctional SR (nSR); principal component analysis (PCA); time to peak (TTP)

## Keywords:

Calcium | ryanodine receptor | cardiac excitation | phosphorylation pattern | structure and function relationship

## Significance Statement

RyRs are ion channels located on the membrane of the sarcoplasmic reticulum that are responsible for an increase in cytosolic  $\text{Ca}^{2+}$  during cell excitation. Here, we investigate how the geometry of

41 RyR clusters combined with spatial phosphorylation patterns impacts on  $\text{Ca}^{2+}$  spark generation  
42 and kinetics. The findings from our study show that both phosphorylation pattern and RyR cluster  
43 shape and dispersion have implications on  $\text{Ca}^{2+}$  spark activity and provide insights into altered  
44  $\text{Ca}^{2+}$  dynamics during HF.

## 45 1 Introduction

46 Excitation-contraction coupling (ECC) refers to a series of electrochemical and mechanical pro-  
47 cesses that repeat during each heartbeat, and allow coupling between electrical excitation and  
48 contraction of the heart (1). During electrical depolarization of a cardiomyocyte, voltage-gated  
49 L-type  $\text{Ca}^{2+}$  channels open, leading to an influx of  $\text{Ca}^{2+}$ . This incoming  $\text{Ca}^{2+}$  triggers additional  
50  $\text{Ca}^{2+}$  release from the sarcoplasmic reticulum (SR) through ryanodine receptors (RyRs) located  
51 on the SR membrane (Figure 1). This process of  $\text{Ca}^{2+}$ -induced  $\text{Ca}^{2+}$  release is central to ECC,  
52 as binding of cytosolic  $\text{Ca}^{2+}$  to the myofilament protein troponin C triggers contraction. Relaxation  
53 then occurs as  $\text{Ca}^{2+}$  levels decline due to RyR closure,  $\text{Ca}^{2+}$  recycling into the SR by the SR  $\text{Ca}^{2+}$ -  
54 ATPase (SERCA) pump, and  $\text{Ca}^{2+}$  flux out of the cell through the Na/Ca exchanger and the plasma  
55 membrane  $\text{Ca}^{2+}$ -ATPase pump.

56 Given the central role of RyRs in controlling cardiomyocyte  $\text{Ca}^{2+}$  homeostasis and contraction,  
57 it is essential that this channel's function is carefully elucidated. It is known that multiple RyRs  
58 collaborate to generate  $\text{Ca}^{2+}$  sparks, which are the fundamental units of SR  $\text{Ca}^{2+}$  release. While  
59 the precise number of RyRs that produce a spark has been debated, it is generally accepted that  
60 6-20 channels participate, yielding a release event 10-15 ms in duration (2). This cooperative  
61 activity appears to be enabled by the organization of RyRs into clusters on the SR membrane,  
62 which allows for cooperative activation. Nearby clusters of RyRs may also collaboratively generate  
63 sparks if they are close enough together (<150 nm) to enable rapid  $\text{Ca}^{2+}$  diffusion between them  
64 (3–5). Such functional groupings of neighbouring RyR clusters are commonly referred to as  $\text{Ca}^{2+}$   
65 release units (CRUs) (5, 6).

66 HF is often characterized on the cellular level by a marked loss of t-tubules and the creation of  
67 "orphaned" RyRs. However, recent data from super-resolution imaging studies have revealed that  
68 the morphology of CRUs also changes in this condition, resulting in smaller and more numerous  
69 RyR clusters (4, 7–9) (Figure 1). This RyR cluster dispersion has been linked to slower  $\text{Ca}^{2+}$  spark  
70 kinetics and a resulting desynchronization of the overall  $\text{Ca}^{2+}$  transient (7, 10). However, RyR  
71 activity is also critically regulated by phosphorylation by protein kinase A (PKA),  $\text{Ca}^{2+}$  calmodulin  
72 kinase type II (CaMKII), and various phosphatases (11) (Figure 1). It is well known that phospho-  
73 rylation increases RyR open probability (11), and that RyR phosphorylation is augmented during  
74 HF (2, 12, 13). Therefore, understanding RyR function and dysfunction during HF requires an inte-  
75 grated understanding of nanoscale RyR localization and phosphorylation status. Complicating the  
76 issue is the finding that RyR phosphorylation patterns may not be uniform. Indeed, Sheard *et al.*  
77 (8) reported while RyRs are uniformly phosphorylated across clusters in healthy cardiomyocytes,  
78 cells from failing hearts exhibited a higher density of PKA-phosphorylated RyRs at the center of  
79 RyR clusters. The functional implications of these changing phosphorylation patterns are unclear,  
80 and have not been addressed in previous computational studies which assumed that all RyRs in  
81 a cluster are equally phosphorylated (14–16).

82 In the present work, we investigated how the spatial organization of RyR clusters affects  $\text{Ca}^{2+}$   
83 dynamics, with a particular focus on changing patterns of phosphorylation. To this end, we have  
84 adapted an existing mathematical model of the CRU (7) to include distinct  $\text{Ca}^{2+}$  sensitivities of  
85 individual RyRs. We expect that our predictions will motivate the design of experiments that can

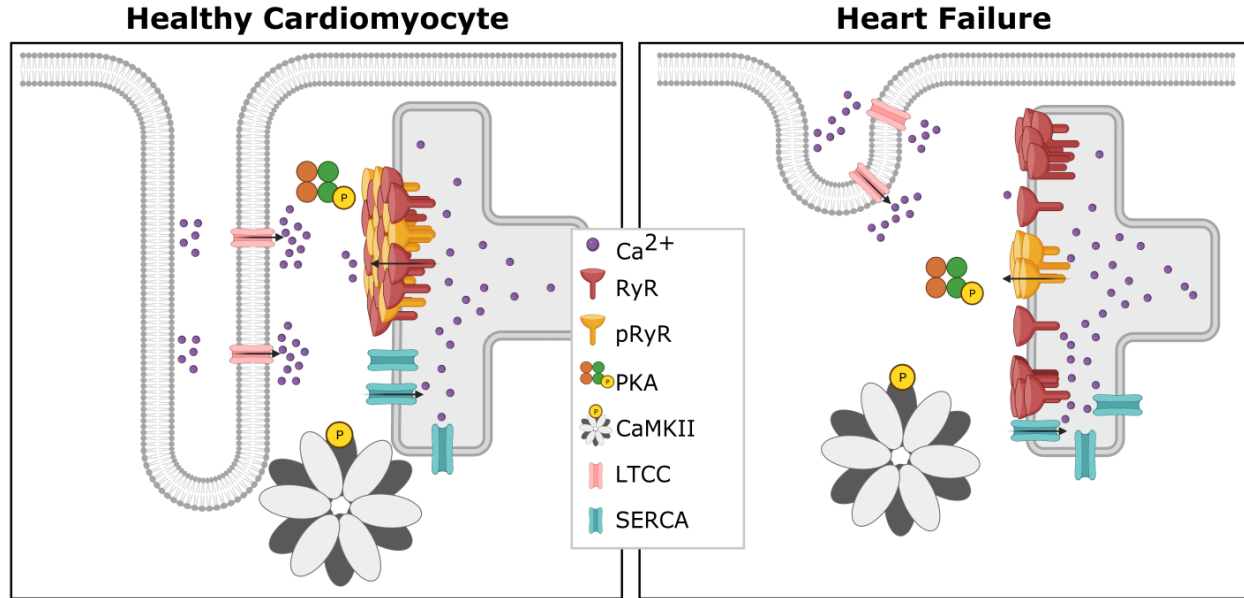

**Figure 1:**  $\text{Ca}^{2+}$ -induced  $\text{Ca}^{2+}$  release occurs at units called dyads, where t-tubules and SR are in close proximity. In comparison with healthy cardiomyocytes (left), diseases such as HF have been linked to marked subcellular remodeling (right). Reported changes in failing myocytes include loss of T-tubule density, dispersion of RyR clusters, and changes in the spatial pattern of RyR phosphorylation.

86 decipher how these localized, nanoscale relationships contribute to impaired  $\text{Ca}^{2+}$  homeostasis  
87 during HF.

## 88 2 Methods

### 89 2.1 Model development

90 The mathematical model from the work of Kolstad *et al.* (7) was adapted to differentiate between  
91 two subgroups of RyRs: phosphorylated and non-phosphorylated RyRs. As described in (7), the  
92 model was extended from the model of Hake *et al.* (17) and includes a stochastic model of RyR  
93 opening developed by Cannell *et al.* (18) for both phosphorylated and unphosphorylated popu-  
94 lations. The system of partial differential equations applied for the spatio-temporal evolution of  
95  $[\text{Ca}^{2+}]$  in the cytosolic domain  $\Omega_c$  was:

$$\left. \begin{aligned} \frac{\partial c}{\partial t} &= D_c \nabla^2 c - \sum_{i=1}^4 R_i(c, b_i) \\ \frac{\partial b_i}{\partial t} &= D_i \nabla^2 b_i + R_i(c, b_i) \\ R_i(c, b_i) &= k_{\text{on}}^i c (B_{\text{tot}}^i - b_i) - k_{\text{off}}^i b_i \end{aligned} \right\} x \in \Omega_c \quad (1)$$

96 with  $c$  corresponding to the calcium concentration in the cytosolic domain,  $D_c$  the diffusion constant  
97 of calcium,  $b_i$  the concentration of the corresponding buffer and  $B_{\text{tot}}^i$  the corresponding total buffer  
98 concentration. In the cytosolic domain the buffers ATP, calmodulin, troponin and Fluo-4 were  
99 included and correspond respectively to numbers 1 to 4 in the equations listed in Equation 2. For  
100 the SR domain  $\Omega_s$  (both junctional and non-junctional SR) one calsequestrin buffer was included

101 and its concentration will be denoted by  $b_5$ . The following equations correspond to the spatio-  
 102 temporal evolution of  $[Ca^{2+}]$  in the SR domain  $\Omega_s$ :

$$\left. \begin{aligned} \frac{\partial s}{\partial t} &= D_s \nabla^2 s - R_5(s, b_5) \\ \frac{\partial b_5}{\partial t} &= R_5(s, b_5) \\ R_5(s, b_5) &= k_{on}^5 s (B_{tot}^5 - b_5) - k_{off}^5 b_5 \end{aligned} \right\} x \in \Omega_s \quad (2)$$

103 with  $s$  corresponding to the calcium concentration in the SR domain. Both domains were coupled  
 104 at the SR membrane with the following boundary conditions:

$$D_c \frac{\partial c}{\partial n} = -D_s \frac{\partial s}{\partial n} = J(c, s) \quad (3)$$

105 with

$$J(c, s) = \begin{cases} J_{RyR} & x \in \Gamma_{RyR} \\ J_{pRyR} & x \in \Gamma_{pRyR} \\ J_{SERCA} & x \in \Gamma_{Serca} \\ 0 & \text{elsewhere} \end{cases} \quad (4)$$

106 The SERCA flux formulation was taken from the three-state SERCA model from Tran *et al.*  
 107 (19). The  $J_{RyR}$  and  $J_{pRyR}$  formulations were identical to the  $J_{RyR}$  flux formulation from Kolstad *et*  
 108 *al.* (7), where a two state stochastic model was used:

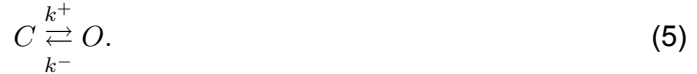

109 Here, C describes the conductive state and O the non-conductive state. The  $k^-$  and  $k^+$  vari-  
 110 ables were defined as:

$$k^+(c) = f\left(\left(\frac{c}{K^+}\right), k_{min}^+, k_{max}^+\right). \quad (6)$$

$$k^-(c) = f\left(\left(\frac{c}{K^-}\right), k_{min}^-, k_{max}^-\right) \quad (7)$$

111 The difference between  $J_{RyR}$  and  $J_{pRyR}$  is the value used for  $K^+$ . Since RyR phosphorylation  
 112 sensitizes the channel more to  $Ca^{2+}$  (12), we simulate this by lowering the  $K^+$  value. For no  
 113 phosphorylation conditions the  $K^+$  value was 55  $\mu M$ . For phosphorylated RyRs the  $K^+$  value  
 114 was 25  $\mu M$ , if a non homogeneous phosphorylation pattern was considered and 45 or 35  $\mu M$  if  
 115 a blanket phosphorylation was assumed. Supplementary Tables 1 and 2 show the model and  
 116 buffering parameters.

## 117 2.2 Geometries

118 The model consists of a single CRU containing both cytosolic and SR domains ( $\Omega_c \cap \Omega_s$ ). We  
 119 assumed that the simulated CRU was a 3D cube with volume  $1.008 \mu m \times 1.008 \mu m \times 1.008 \mu m$ .  
 120 Cube dimensions were  $12 \text{ nm} \times 12 \text{ nm} \times 12 \text{ nm}$  ( $\Delta x = 12 \text{ nm}$ ) with 84 voxels per axis.

121 The RyR geometries were inspired by the super-resolution images of Kolstad *et al.* (7). How-  
 122 ever, in this work we constrained the number of RyRs to 50 for all geometries, which is within the

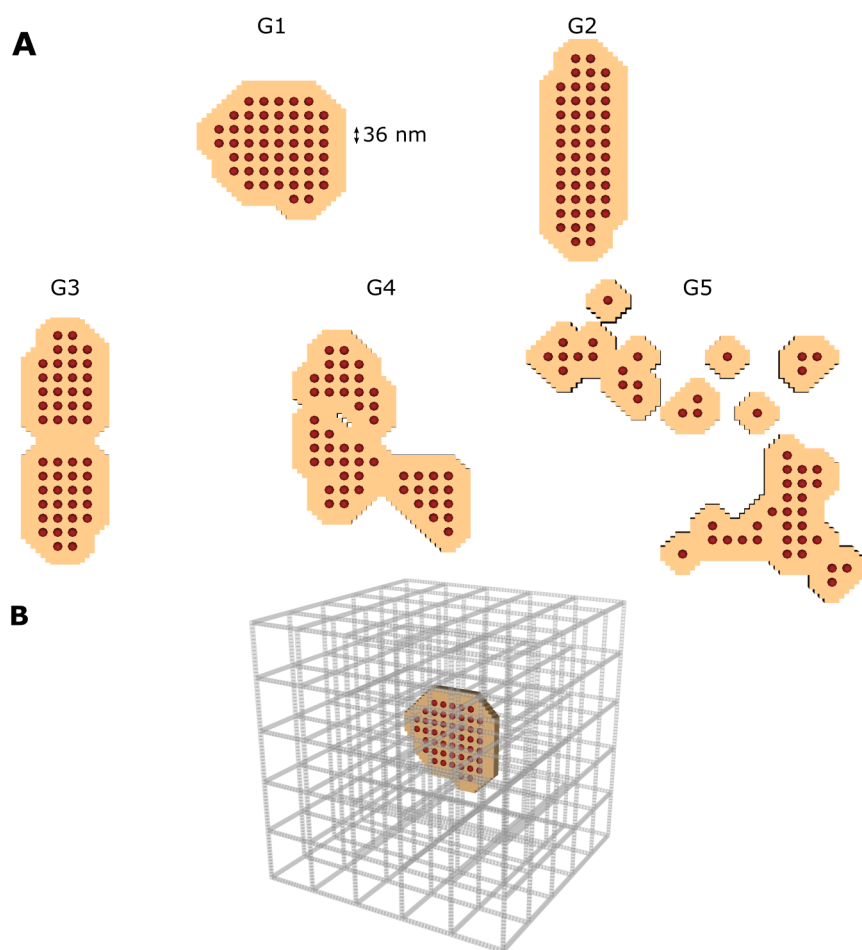

**Figure 2:** (A) The five different RyR geometries studied in the model. The red dots show the single RyRs and the tan coloured area represents the junctional SR membrane. All five geometries contain 50 RyRs. The first two geometries (G1 and G2) contain a single cluster to simulate the healthy case. The latter 3 geometries (G3, G4, and G5) differ in the number of CRU sub-clusters, to simulate the disrupted RyR clusters observed during HF. G3, G4 and G5 are organized into 2, 3 and 12 sub-clusters respectively. (B) The computational domain of the cytosol is presented. The space corresponds  $1.008 \mu\text{m} \times 1.008 \mu\text{m} \times 1.008 \mu\text{m}$ . The grey bars represent the non-junctional SR.

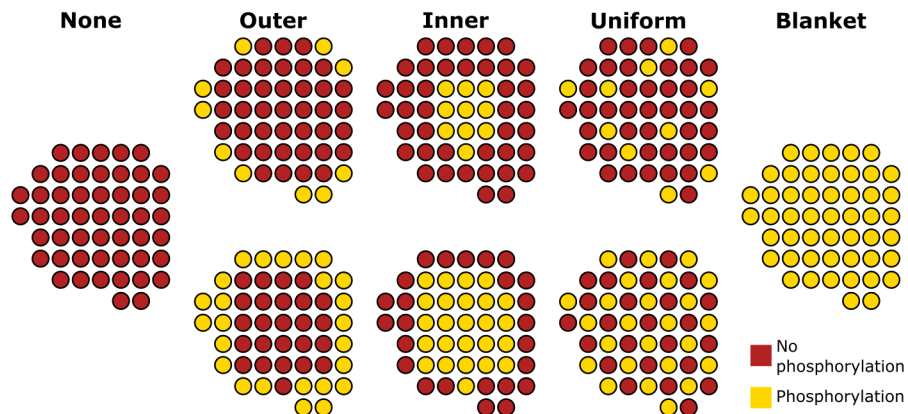

**Figure 3:** Schematic of the different phosphorylation setups used in the model demonstrated using the geometry G1 as an example case. For the three phosphorylation patterns (outer, inner and uniform) two configurations were assumed: 20% (upper row) and 50% (lower row) of the RyRs being phosphorylated.

123 measured range in experiments (7). Five different geometries were designed. The first two ge-  
124 ometries (G1 and G2) contain a single cluster to simulate the healthy case (Figure 2A). The main  
125 difference between G1 and G2 is the shape of the cluster; while G1 is a more compact distribution,  
126 G2 is oblong. By comparing G1 and G2, we can determine whether altering cluster shape without  
127 adjusting the density has an impact on spark dynamics. The latter 3 geometries (G3, G4, and G5)  
128 differ in the number of CRU sub-clusters. Disrupted RyR clusters containing several sub-clusters  
129 have been observed in rats with HF (7). Therefore G3, G4, and G5 contain 50 RyRs distributed in  
130 2, 3, and 12 sub-clusters, respectively.

131 Each RyR has an area of  $36 \text{ nm} \times 36 \text{ nm}$ . The center-to-center distance between two neighbour-  
132 ing RyRs is  $36 \text{ nm}$ , as described in (7). The jSR was designated as the area of a single receptor  
133 around each RyR ('padding'), in the same fashion as Kolstad *et al.* (7). The SR surface area is  
134 given in Supplemental Table 3. The nSR was assumed to be a regular grid throughout the cytosol.  
135 The SERCA surface has a range of  $4.54 - 4.85 \mu\text{m}^2$ . The jSR and nSR surface areas agree with  
136 the surface areas measured by Hake *et al.* (17) in EM tomography dyad reconstructions. Figure  
137 2B shows the location of the RyRs and jSR within the nSR grid for the G1 geometry.

### 138 2.3 Phosphorylation patterns

139 Since the goal of this study is to analyze the impact of spatial phosphorylation patterns on  $\text{Ca}^{2+}$   
140 spark signals, three different phosphorylation patterns were applied (Figure 3). Additionally, sim-  
141 ulations with no phosphorylated RyRs and with blanket phosphorylation of all RyRs (to emulate  
142 previous computational models) were carried out. This resulted in 8 phosphorylation setups per  
143 geometry. An example of the 8 phosphorylation setups for geometry G1 is shown in Figure 3.

144 Sheard *et al.* (8) reported that in HF, a spatial gradient of RyR hyperphosphorylation occurs  
145 with the highest phosphorylation levels occurring within the center of the nanodomain. In order to  
146 simulate this, phosphorylated RyRs were chosen using principal component analysis (PCA) (20).  
147 The eigenvectors of the covariance matrix of the RyR positions were calculated to estimate the  
148 directions of maximal information of the CRU. With both orthogonal eigenvectors, an ellipse is  
149 generated. The ellipse dimensions were then decreased until the desired number of RyRs was  
150 phosphorylated. Figure S1 depicts an example of the PCA method applied to geometry G1 to  
151 calculate the inner phosphorylation. By applying this technique we select the desired number of



152 RyRs in the center of the CRU when simulating HF conditions. We also chose to study the oppo-  
153 site pattern using the same PCA technique but phosphorylating RyRs near the outer boundary of  
154 the cluster. Although this specific phosphorylation pattern has not been observed in experimental  
155 studies, we include it in our simulations for completeness. These two PCA-based phosphoryla-  
156 tion schemes will be referred to as inner and outer phosphorylation patterns from here onwards.  
157 For each pattern, two phosphorylation levels were simulated: 20% (10 RyRs) and 50% (25 RyRs)  
158 phosphorylation of the cluster. Finally, in order to simulate a uniform distribution of the phospho-  
159 rylation pattern, as may be the case in the healthy condition (described in (8)), we simulated a  
160 uniformly distributed phosphorylation condition (again at 20% and 50% levels). In total, 8 different  
161 phosphorylation configurations per geometry were analyzed, all of which are visualized for the G1  
162 geometry in Figure 3. An overview of the phosphorylation patterns used for G2, G3, G4 and G5 is  
163 provided in the supplementary material (Figures S2 and S3). Since the 8 different phosphorylation  
164 patterns were simulated for 5 different geometries, this results in 40 different spatial configurations.

## 165 2.4 Numerics

166 Since the model used assumes a stochastic model for RyR opening, 200 runs were carried out for  
167 each of the 40 configuration setups (5 geometries  $\times$  8 phosphorylation patterns). The simulations  
168 were initiated by randomly opening 1 RyR within the specific geometry, and the RyR fluxes were  
169 then calculated. Opening and closing of a single RyR was based on local  $\text{Ca}^{2+}$  concentrations. The  
170 simulations were terminated when all RyRs were closed and remained closed for 1 ms. Therefore,  
171 we define spark duration as the duration of the simulations 1 ms after all RyRs are closed. The  
172 stochastic RyR model was calculated for a fixed time step of  $\Delta t = 1$  ms. The model calculations  
173 were very stiff due to the small element volumes and the large fluxes. Therefore, the calculations  
174 of the fluxes in the model were solved analytically as described in (7). We also used the follow-  
175 ing definitions to classify and quantify our results. We consider a spark to be successful if local  
176 increases in simulated  $\text{Ca}^{2+}$  fluorescence intensity exceeded 30% ( $\Delta F/F_0 \geq 0.3$ ), and used the  
177 fraction of these successful sparks to estimate spark fidelity. The confidence interval of spark fi-  
178 delity was calculated using the Agresti-Coull confidence interval (21). Additional spark properties  
179 including the amplitude, time to peak (TTP), and spark simulation duration were used to compare  
180 and contrast different scenarios. For these three properties, the confidence interval was calculated  
181 using the standard error.

## 182 3 Results

### 183 3.1 Circular CRUs increase spark fidelity and amplitude

184 First, simulations without RyR phosphorylation were carried out for all 5 geometries. Figure S4  
185 shows that our simulation results match the results from Kolstad *et al.* (7), as spark fidelity and  
186 amplitude decrease with increasingly dispersed RyR configurations. We additionally compared  
187 two single-cluster geometries (G1 and G2), where G1 had a compact circular geometry and G2 a  
188 more oblong arrangement. Interestingly, a clear difference in spark fidelity (ie. proportion of sparks  
189 with  $\Delta F/F_0 > 0.3$ ) is observed between these two geometries (Figure S4). This is illustrated by  
190 the spark time courses for G1 *versus* G2 (Figure 4A and B, respectively). For G1, 63 out of 200  
191 sparks were successful (dark gray sparks), while for G2 only 29 successful sparks occurred. Figure  
192 4C shows the probability of spark generation for both geometries. Out of 200 simulations,  $31.8\%$   
193  $\pm 6.4\%$  surpassed the spark detection threshold for G1. This number was significantly lower in the

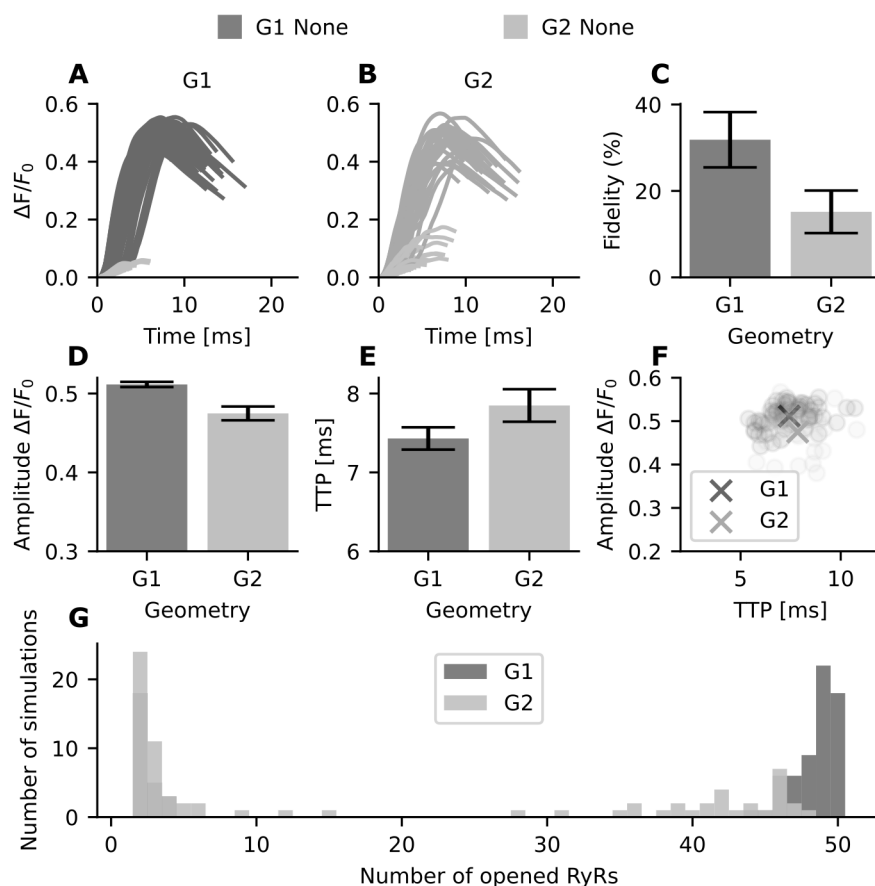

**Figure 4: Spark properties of unphosphorylated RyR in geometries G1 and G2.** For each geometry 200 simulations were conducted. (A) Intensity over time for G1 calcium sparks. dark gray: successful sparks (n=63), light gray: failed sparks. (B) Intensity over time for G2 calcium sparks. dark gray: successful sparks (n=29), light gray: failed sparks. (C) The probability of spark generation (spark fidelity) for G1 and G2. Error bars indicate the 95% Agresti-Coull confidence interval. (D) Spark amplitude (mean  $\pm$  standard error) for successful sparks in G1 and G2. (E) Average time to peak (TTP) (mean  $\pm$  standard error) for G1 and G2, in ms. (F) Scatter plot of spark amplitude *versus* TTP. The crosses represent the mean values across all simulations for G1 and G2. (G) Histogram tracking total number of opened RyRs across individual simulations for G1 and G2. For example, for geometry G1 all 50 RyRs are opened in 18 simulations, whereas for G2 no simulations had 50 open RyRs.



194 G2 geometry, which had a spark fidelity of  $15.2\% \pm 4.9\%$ . In addition to a decrease in fidelity, the  
195 oblong geometry in G2 also results in a significantly lower amplitude (Figure 4D) and longer time  
196 to peak (TTP), see Figure 4E. A scatter plot of these measurements in individual sparks is shown  
197 in Figure 4F.

198 We next investigated, whether the lower amplitude, slower kinetics, and lower fidelity of  $\text{Ca}^{2+}$   
199 sparks generated by the oblong G2 vs compact G1 configuration were linked to a differing number  
200 of RyRs being activated. To this end, we plotted a histogram of the number of RyRs opened per  
201 simulation (Figure 4G). Note that the G1 geometry exhibits an “all-or-none” behaviour, with bimodal  
202 clustering near either one or all 50 of the RyRs being activated in a single simulation. In compar-  
203 ison, G2 shows more varied behavior, and no simulations with full activation. This behaviour is  
204 also observed in the activation map of a single simulation for both G1 and G2 (Figure S5). For  
205 the G2 simulation activation map shown, the RyRs located at the edges of the geometry are not  
206 activated. Thus, our results show that the nanoscale organization of the unphosphorylated RyR  
207 clusters affects  $\text{Ca}^{2+}$  dynamics, as compact, circular nanoclusters generate larger and faster  $\text{Ca}^{2+}$   
208 sparks than elongated nanoclusters.

### 209 **3.2 Phosphorylation pattern of the RyR cluster determines spark properties.**

210 As shown in (8), different spatial patterns can be observed for RyR phosphorylation in the CRU.  
211 However, computational models generally assume all RyRs in a CRU to be identically sensitized  
212 due to a lack of spatial detail (14–16). We next tested if there was a difference in  $\text{Ca}^{2+}$  dynamics  
213 when all receptors are phosphorylated (“blanket” phosphorylation) as opposed to some percentage  
214 of uniformly phosphorylated receptors in the cluster (see Figure 3 for schematic). To capture the ef-  
215 fects of receptor phosphorylation and calcium sensitivity, we varied  $K^+$  in the range [25  $\mu\text{M}$ , 35  $\mu\text{M}$ ,  
216 45  $\mu\text{M}$ , and 55  $\mu\text{M}$ ]. Here 55  $\mu\text{M}$  represents nonphosphorylated RyR and therefore  $K_{\text{RyR}}^+$ . On the  
217 other hand, 25  $\mu\text{M}$  represents the situation of uniform phosphorylation (both 20% and 50%); 35  $\mu\text{M}$   
218 and 45  $\mu\text{M}$  represent blanket phosphorylation scenarios. These three values represent  $K_{p\text{RyR}}^+$ .

219 Sparks generated by a 20% uniform phosphorylation pattern (with  $K_{p\text{RyR}}^+ = 25 \mu\text{M}$  and  $K_{\text{RyR}}^+ =$   
220 55  $\mu\text{M}$ ) were compared to blanket phosphorylation, with  $K_{p\text{RyR}}^+ = 45 \mu\text{M}$ . A pattern of 50% uniform  
221 phosphorylation (with  $K_{p\text{RyR}}^+ = 25 \mu\text{M}$  and  $K_{\text{RyR}}^+ = 55 \mu\text{M}$ ) was in turn compared with blanket phos-  
222 phosphorylation ( $K_{p\text{RyR}}^+ = 35 \mu\text{M}$ ). The results are shown for G2 and G3 in Figure 5. The lighter shades  
223 represent a 20% uniform phosphorylation pattern (light red) and blanket phosphorylation with a  $K^+$   
224 value of 45 (light gray). The darker shades represent a 50% uniform phosphorylation pattern (dark  
225 red) and blanket phosphorylation with a  $K^+$  value of 35 (dark gray). We find that, by adjusting  
226  $K^+$  values, outputs from blanket phosphorylation match those from uniform phosphorylation for all  
227 analyzed spark properties (Figure 5A-D).

228 We next evaluated the effect of different phosphorylation patterns of the RyR nanocluster in G1  
229 (Figure 6). RyR phosphorylation leads to an increase in  $\text{Ca}^{2+}$  spark fidelity regardless of pattern  
230 (Figure 6A). When comparing the different patterns at the same degree of phosphorylation (20%  
231 or 50%), inner phosphorylation results in the largest increase in fidelity, followed by the uniform  
232 pattern, with the outer pattern exhibiting the smallest increase ( $62.3\% \pm 6.7\%$  vs  $60.3\% \pm 6.7\%$  vs  
233  $58.8\% \pm 6.8\%$  at 50% phosphorylation, and  $48.5\% \pm 6.9\%$  vs  $47.1\% \pm 6.9\%$  vs  $31.8\% \pm 6.4\%$   
234 at 20% phosphorylation).

235 Plotting spark duration against spark amplitude (Figure 6B), we found that outer phosphoryla-  
236 tion produces slightly larger sparks than uniform or inner phosphorylation ( $\Delta F/F_0 = 0.560 \pm 0.001$   
237 for 50% outer phosphorylation vs  $0.547 \pm 0.001$  for 50% uniform phosphorylation vs  $0.531 \pm 0.002$   
238 for 50% inner phosphorylation, Figure 6C). We also measured TTP and spark duration for the same

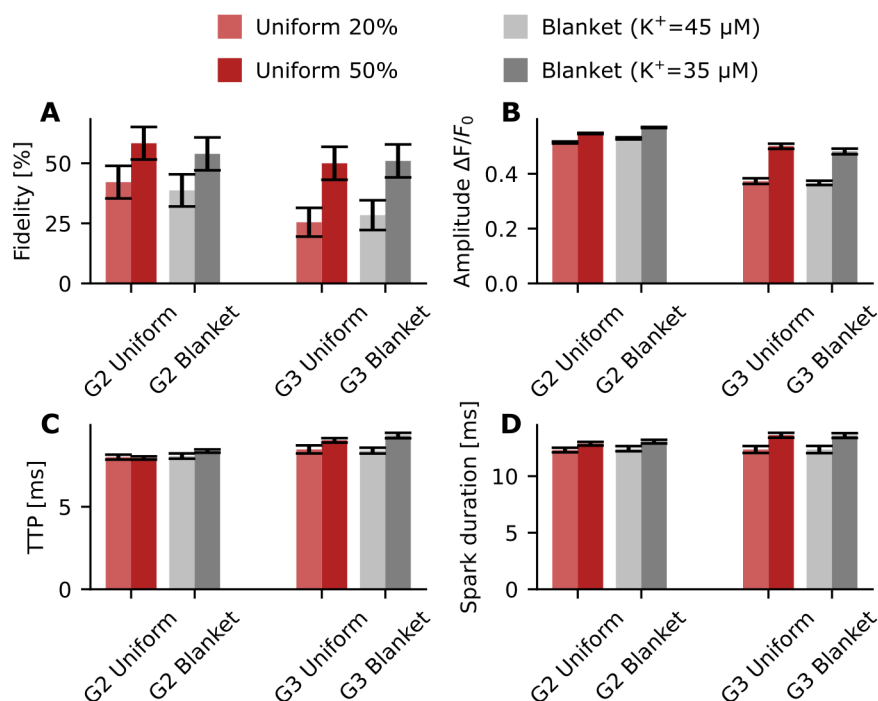

**Figure 5: Properties of sparks obtained from uniformly distributed phosphorylation pattern versus blanket phosphorylation for G2 and G3.** Red bars represent simulations with a uniformly distributed phosphorylation pattern of 20% (light red) or 50% (dark red) of the receptors. The gray bars represent simulations with a blanket phosphorylation pattern. (A) Fidelity for G2 and G3 at different phosphorylation levels and patterns; the black bars indicate the 95% Agresti-Coull confidence interval. (B) Amplitude (mean  $\pm$  standard error) is shown using a bar chart (for G2 uniform 20% n=84 ( $K_{pRyR}^+ = 25 \mu\text{M}$  and  $K_{RyR}^+ = 55 \mu\text{M}$ ), for G2 uniform 50% n=117 ( $K_{pRyR}^+ = 25 \mu\text{M}$  and  $K_{RyR}^+ = 55 \mu\text{M}$ ), for G2 blanket ( $K_{pRyR}^+ = 45 \mu\text{M}$ ) n=77, for G2 blanket ( $K_{pRyR}^+ = 35 \mu\text{M}$ ) n=108, for G3 uniform 20% n=50 ( $K_{pRyR}^+ = 25 \mu\text{M}$  and  $K_{RyR}^+ = 55 \mu\text{M}$ ), for G3 uniform 50% n=100 ( $K_{pRyR}^+ = 25 \mu\text{M}$  and  $K_{RyR}^+ = 55 \mu\text{M}$ ), for G3 blanket ( $K_{pRyR}^+ = 45 \mu\text{M}$ ) n=56, and for G2 blanket ( $K_{pRyR}^+ = 35 \mu\text{M}$ ) n=102. (C) TTP (mean  $\pm$  standard error) is shown using a bar chart. (D) Spark duration (mean  $\pm$  standard error) is shown using a bar chart.

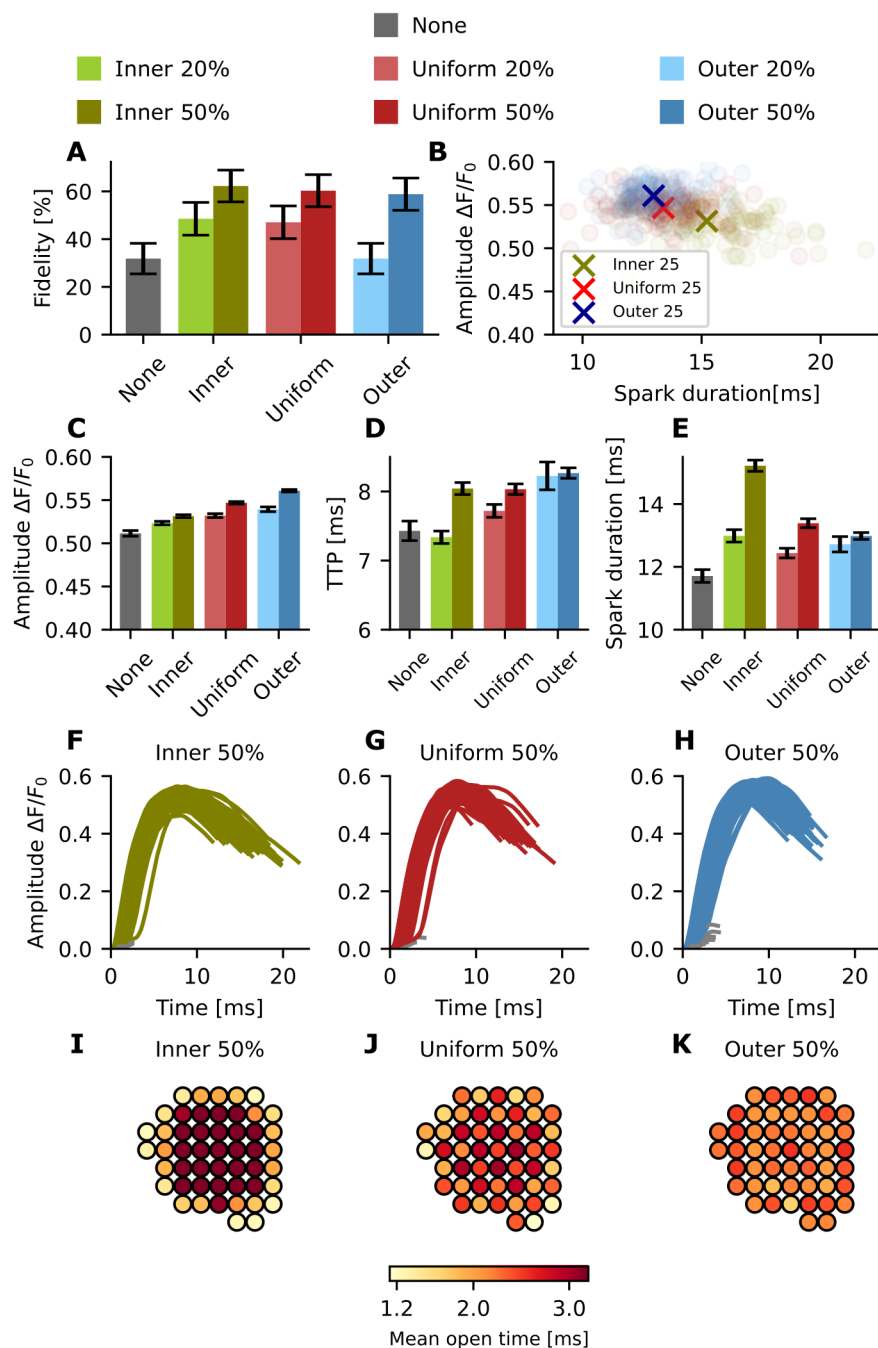

**Figure 6: Effect of phosphorylation pattern on  $\text{Ca}^{2+}$  spark properties in G1.** For each pattern, 200 simulations were conducted. green: inner, red: uniform, blue: outer. Lighter shades: 20% phosphorylation, darker shades: 50% phosphorylation. (A) Spark fidelity for inner, uniform, and outer phosphorylation patterns in G1. The black bars indicate the 95% Agresti-Coull confidence interval. (B) Scatter plot comparing spark duration and amplitude. Circles: single simulations, crosses: mean values. (C) Spark amplitude (mean  $\pm$  standard error) for inner, uniform, and outer phosphorylation patterns in G1. (For no phosphorylation  $n=63$ , for inner 20%  $n=97$ , for inner 50%  $n=125$ , for uniform 20%  $n=94$ , for uniform 50%  $n=121$ , for outer 20%  $n=63$ , and for outer 50%  $n=118$ ) (D) TTP (mean  $\pm$  standard error) for inner, uniform, and outer phosphorylation patterns in G1. (E) Spark duration (mean  $\pm$  standard error) for inner, uniform, and outer phosphorylation patterns in G1. (F) Intensity timecourse for successful sparks with inner phosphorylation. (G) Intensity timecourse for successful sparks with uniform phosphorylation. (H) Intensity timecourse for successful sparks with outer phosphorylation. (I) Mean open time for each RyR throughout 200 simulations - inner 50% phosphorylation. (J) Mean open time for each RyR throughout 200 simulations - uniform 50% phosphorylation. (K) Mean open time for each RyR throughout 200 simulations - outer 50% phosphorylation.

239 phosphorylation patterns (Figures 6D and 6E). Phosphorylation leads to increased spark duration  
240 in our model, across all patterns. An increased TTP was also seen across the different patterns,  
241 with the exception of the inner 20% configuration. For 20% phosphorylation, outer phosphoryla-  
242 tion leads to the highest increase in TTP, followed by uniform, then inner (Figure 6D). However, for  
243 50% phosphorylation there is no significant difference between the TTP for the inner and uniform  
244 patterns (around 8 ms). This suggests that the relative effect on TTP decreases with increasing  
245 fraction of phosphorylated RyRs.

246 To mechanistically understand the rather complicated dependence of spark kinetics on phos-  
247 phosphorylation pattern, we studied the dynamics of individual simulations by tracking the opening and  
248 closing of the RyRs for single representative sparks (see movies M1-M6). Based on these movies,  
249 we first confirm that with inner phosphorylation, the TTP is faster compared to other phosphoryla-  
250 tion patterns (Movie M4). However, due to the phosphorylation, the inner RyRs are more likely to  
251 reopen, which prolongs the total spark duration and creates a plateau of  $\text{Ca}^{2+}$  release, an effect  
252 that is particularly prominent at high phosphorylation levels. Additionally, the sensitized RyRs are  
253 able to sustain the regenerative release longer, resulting in higher fractional release from the SR.  
254 Therefore, the morphology of the spark changes from containing a single discernable peak in the  
255 unphosphorylated case to a plateau phase in the phosphorylated cases. The sparks measured  
256 with an inner phosphorylation pattern have a longer duration compared to the uniform and outer  
257 case ( $15.2 \pm 0.18$  ms vs  $13.4 \pm 0.14$  ms vs  $13.0 \pm 0.11$  ms at 50% phosphorylation, and  $13.0$   
258  $\pm 0.19$  ms vs  $12.4 \pm 0.15$  ms vs  $12.7 \pm 0.24$  ms at 20% phosphorylation), despite the shorter TTP  
259 (see Figure 6F-H). Importantly, phosphorylation patterns were found to have a large impact on the  
260 mean open time of individual RyRs within the cluster (Figure 6I-K). With a uniform phosphorylation  
261 pattern, RyRs located near the center of the cluster tended to be open longer than the channels  
262 located at the outer boundary (Figure 6J). In other words, the central channels anchored regener-  
263 ative release. This effect is emphasized even more strongly with an inner phosphorylation pattern,  
264 since the inner channels are sensitized both by their spatial location and their phosphorylated state  
265 (Figure 6I). For the outer phosphorylation pattern, the effect is reversed, with channels across the  
266 cluster exhibiting close to uniform mean open times (Figure 6K). Taken together, our simulations  
267 predict that the phosphorylation pattern within the CRU has a marked impact on  $\text{Ca}^{2+}$  spark dy-  
268 namics, as inner phosphorylation leads on average to higher fidelity, lower amplitudes, and longer  
269 spark durations than uniform or outer phosphorylation patterns.

### 270 **3.3 Inner phosphorylation maximizes spark fidelity and increases spark amplitude** 271 **in a dispersed RyR cluster organization**

272 We next analyzed the effects of RyR phosphorylation in disrupted CRU geometries, which are  
273 reported in HF (7). As noted above, when all the RyRs are unphosphorylated, we observed a  
274 step-wise decrease in spark fidelity and amplitude with increasing dispersal of the CRU geometries  
275 (Figure S4). These results match the outcomes of previous work based on the same model (7).  
276 As described by Sheard *et al.* (8), during HF, a shift of the PKA-mediated phosphorylation pattern  
277 is observed towards the center of the cluster. Therefore we investigated whether the effects of the  
278 phosphorylation patterns shown in Figure 6 are also observed in disrupted geometries.

279 We first focus on the differences between G2 and G3, since the only difference between these  
280 geometries is that G2 contains one cluster and G3 two sub-clusters, while overall cluster shape  
281 is maintained (Figure 2). For both geometries, higher spark fidelity is observed when applying  
282 inner phosphorylation compared to a uniform or outer phosphorylation (Figure 7A). We also ob-  
283 serve a significant increase in spark duration for both geometries with inner phosphorylation in  
284 comparison with uniform and outer phosphorylation patterns ( $14.2 \pm 0.16$  ms vs  $12.9 \pm 0.16$  ms

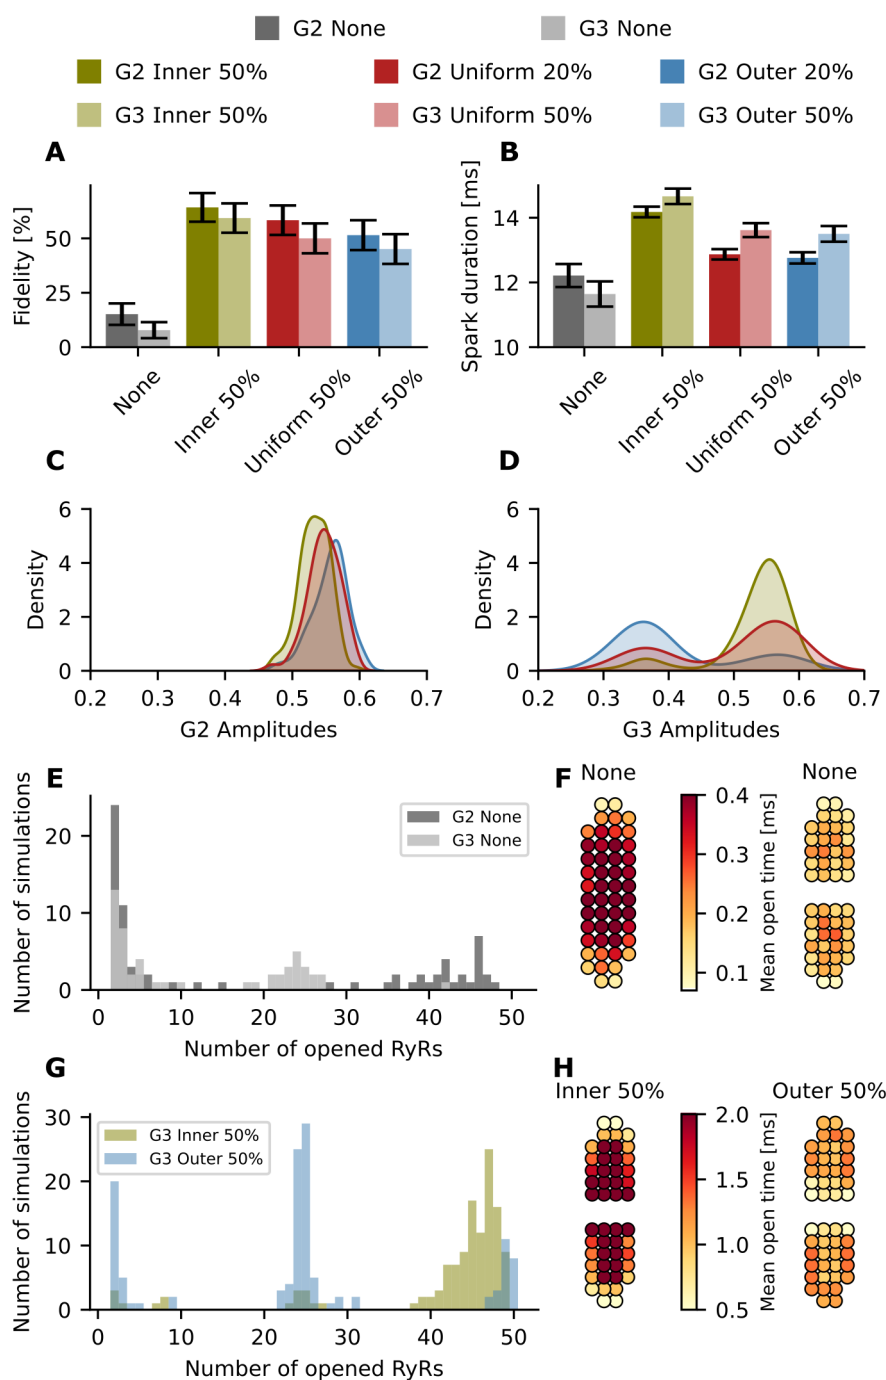

**Figure 7: Effect of dispersed and phosphorylated RyR nanoclusters on spark properties.** Green: inner; red: uniform; blue: outer; gray: no phosphorylation. Opaque colours: G2; translucent colours: G3. (A) Spark fidelity for none, inner, uniform, and outer phosphorylation in G2 and G3. The black bars indicate the 95% Agresti-Coull confidence interval. (B) Spark duration (mean  $\pm$  standard error) for none, inner, uniform, and outer phosphorylation in G2 and G3. (C) Kernel density estimate plot of the amplitudes for the three phosphorylation patterns in G2. (D) Kernel density estimate plot of the amplitudes for the three phosphorylation patterns in G3. (E) Histogram of opened RyRs per simulation for G2 and G3 with no phosphorylation. (F) Geometric visualization of mean open times for each RyR throughout all 200 simulations for G2 and G3. (G) Histogram of opened RyRs per simulation for G3 with inner and outer phosphorylation. (H) Geometric visualization of mean open times for G3 with inner and outer phosphorylation.

285 vs  $12.76 \pm 0.17$  ms at major phosphorylation for G2, and  $14.7 \pm 0.24$  ms vs  $13.6 \pm 0.22$  ms vs  
286  $13.5 \pm 0.24$  ms at major phosphorylation for G3) (Figure 7B).

287 However, differing effects on spark amplitude were observed for compact geometry G2 and  
288 discontinuous geometry G3 (Figure 7C and Figure 7D). Indeed, for G1 and G2, an increase in  
289 amplitude is observed when shifting phosphorylation from the inner to the outer pattern (Figures 6  
290 and 7). G3 exhibits the opposite behaviour, as the mean amplitude is highest when assuming inner  
291 phosphorylation on amplitude, followed by a uniform phosphorylation and an outer phosphorylation  
292 ( $0.532 \pm 0.005$  vs  $0.500 \pm 0.009$  vs  $0.412 \pm 0.010$  at major phosphorylation for G3). Interestingly,  
293 kernel density plots show that changing the phosphorylation pattern had rather complex effects  
294 on spark amplitude, as data from the G2 configuration showed a Gaussian relationship, while  
295 biphasic curves were observed for the G3 configuration. To understand the described effects  
296 of phosphorylation, histograms showing the number of opened RyRs vs number of simulations  
297 (Figure 7E and Figure 7G) are illustrative. When plotting the no phosphorylation case for G2 and  
298 G3 in Figure 7E, we observe that in a successful spark for G3, only around 25 RyRs open, as  
299 activation was limited to one sub-cluster. For G2, however, we see that if a spark is generated the  
300 number of opened RyRs is much higher. It is notable that RyRs in the center of each subcluster  
301 tend to open more frequently and for longer durations than RyRs on the boundary (see Figure 7F)  
302 resulting in higher probability for the released  $\text{Ca}^{2+}$  to activate the neighbouring subcluster

303 When applying a phosphorylation pattern, however, the activation map changed consider-  
304 ably(see Figure 7H). For the inner case, the number of open RyRs increased dramatically (Figure  
305 7G) and phosphorylated RyRs remained open for longer (Figure 7H), leading to more reliable ac-  
306 tivation of the neighbouring subcluster. This jumping of released  $\text{Ca}^{2+}$  between subclusters was  
307 much less frequent with an outer phosphorylation pattern, with a lower number of RyRs being  
308 activated (Figure 7G).

309 The histogram also helps to explain the biphasic curves in the amplitude kernel density estimate  
310 plot (Figure 7D). The first peak, at lower amplitude, represents sparks generated when only one  
311 sub-cluster is activated. The second peak, at higher amplitudes, represents sparks generated  
312 when both sub-clusters are activated. For inner phosphorylation, the mode occurs at a higher  
313 amplitude of around 0.55, whereas outer phosphorylation more often reaches an amplitude of  
314 0.35 more characteristic of single subcluster activation.

315 We next investigated the effect of phosphorylation on clusters with pronounced dispersion (Fig-  
316 ure 8). The activation maps for G4 and G5 are shown in Figure 8A. We found that inner phos-  
317 phorylation yielded higher spark fidelity pattern than for a uniform or outer phosphorylation pattern  
318 (Figure 8B); effects that were more marked than observations made in condensed CRUs (compare  
319 with Figure 6). For 50% phosphorylation the fidelity is  $38.7 \pm 6.69\%$  for an inner phosphorylation,  
320 whereas for uniform and outer phosphorylation, the fidelity is to  $30.4 \pm 6.31\%$  and  $12.7 \pm 4.57\%$ ,  
321 respectively. Indeed for G5, this effect is even more relevant since only the inner 50% phospho-  
322 rylation and the uniform 50% phosphorylation patterns generate any sparks over the 0.3 threshold  
323 (Figure 8C). Spark properties calculated for G4 showed that, as for G3, the inner phosphorylation  
324 yields longer sparks with a higher amplitude (Figures 8D-F). We do not show the outcomes of  
325 the spark analysis for geometry G5 since the number of successful sparks is too low to generate  
326 meaningful statistics. These outcomes suggest that phosphorylation pattern may be of particular  
327 importance in severely disrupted CRU geometries, where reorganisation of phosphorylated RyRs  
328 toward cluster centers may provide a compensatory effect and allow sparks to persist.



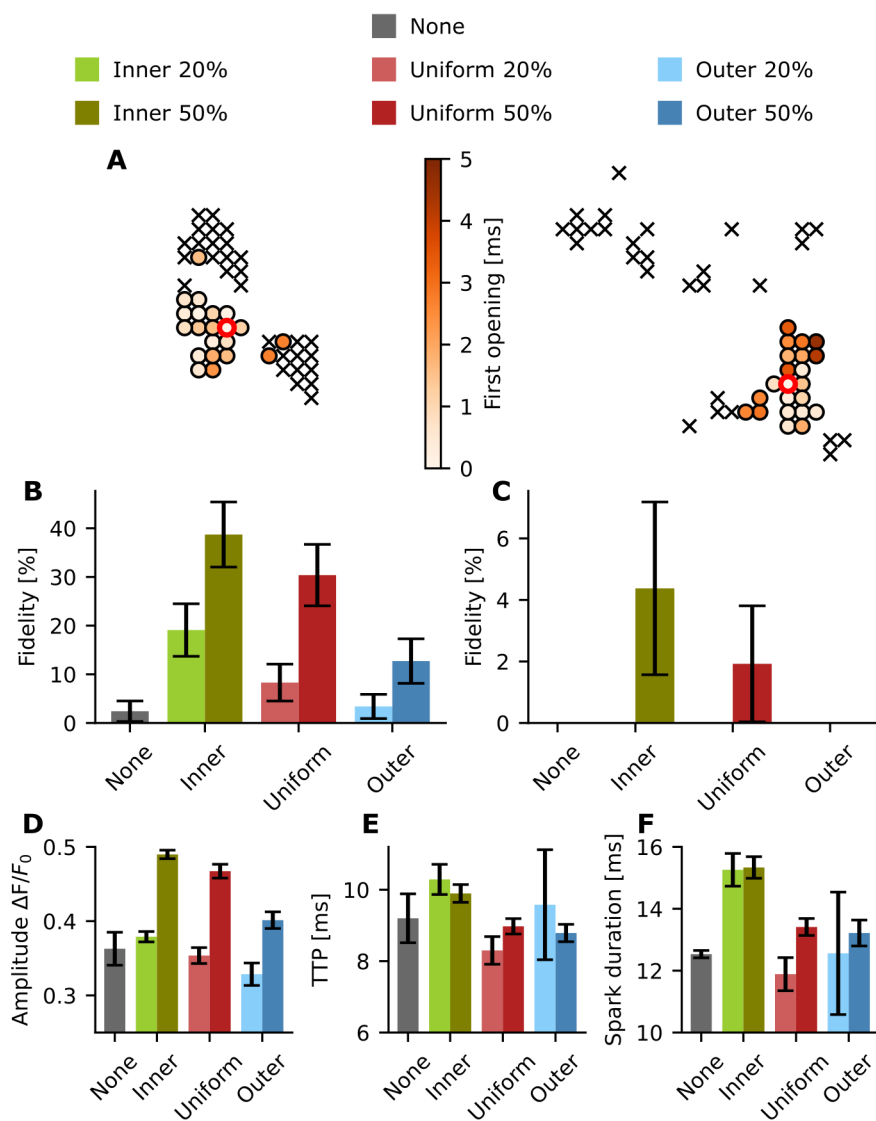

**Figure 8: Spark properties for disrupted geometries G4 and G5.** For each setup 200 single simulations were conducted. Green: inner; red: uniform; blue: outer; gray: no phosphorylation. light colours: 20% phosphorylation; dark colours: 50% phosphorylation. (A) Activation map with the first opening time of each RyR for a representative simulation for uniform phosphorylation, G4 (left) and G5 (right). 'x' indicates that the RyR did not open during the simulation. red circle: initial open RyR. (B) Spark fidelity for none, inner, uniform, and outer phosphorylation in G4. The black bars indicate the 95% Agresti-Coull confidence interval. (C) Spark fidelity for none, inner, uniform, and outer phosphorylation in G5. The black bars indicate the 95% Agresti-Coull confidence interval. (D) Amplitude (mean  $\pm$  standard error) for none, inner, uniform, and outer phosphorylation in G4 (no phosphorylation n=3, inner 20% n=37, inner 50% n=77, uniform 20%=15, uniform 50%=60, outer 20% n=5, outer 50% n=24). (E) TTP (mean  $\pm$  standard error) for none, inner, uniform, and outer phosphorylation in G4. (F) Spark duration (mean  $\pm$  standard error) for none, inner, uniform, and outer phosphorylation in G4.

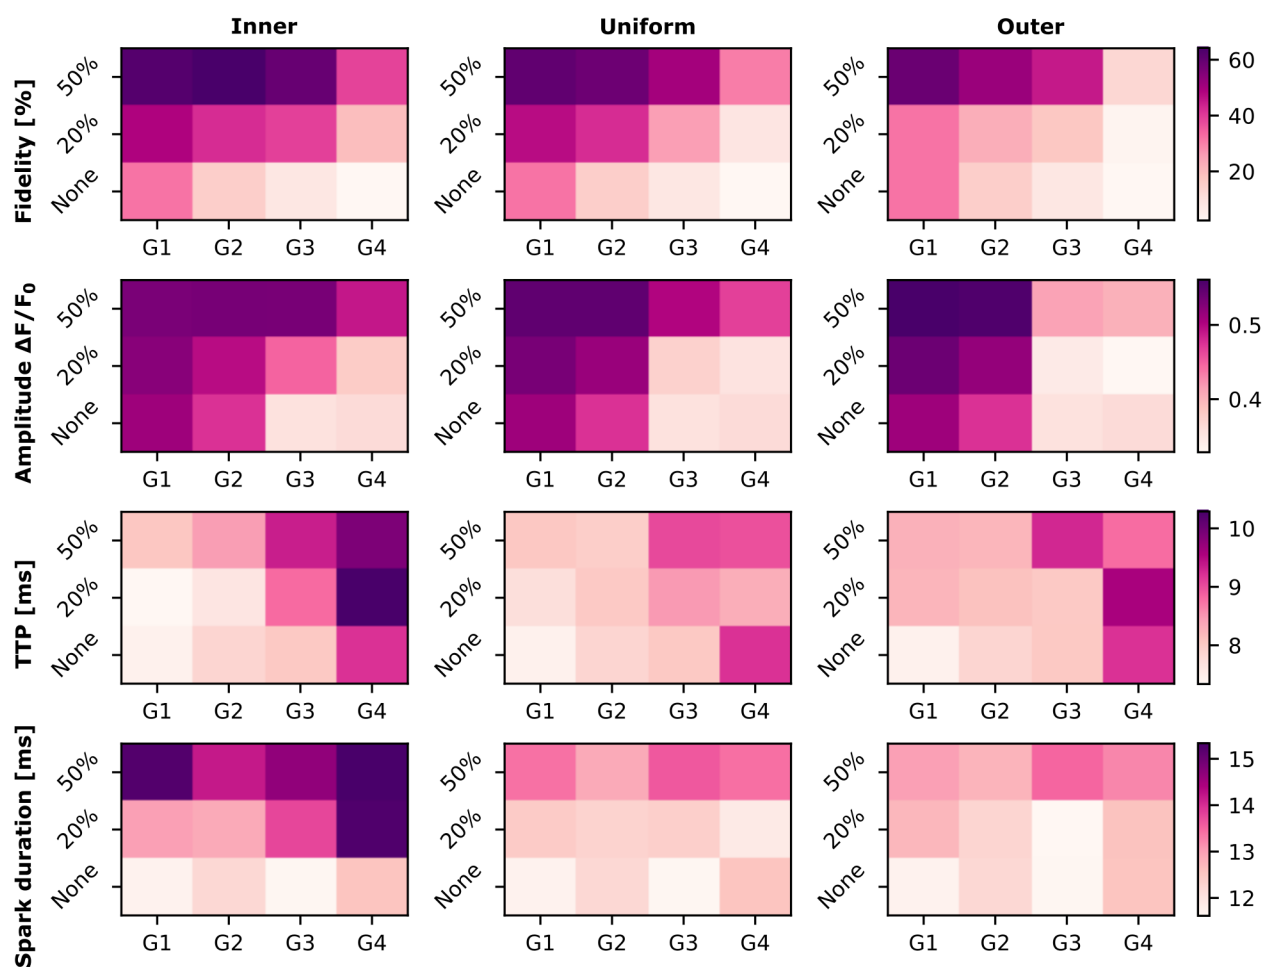

**Figure 9: Heat maps depicting a summary of the  $\text{Ca}^{2+}$  spark properties for different phosphorylation patterns.** The rows show the different spark properties (fidelity, amplitude, TTP and spark duration) that were analyzed. The columns represent the different phosphorylation patterns studied in this work.  $\text{Ca}^{2+}$  spark properties depend on RyR cluster geometry, cluster integrity, and spatial organization of phosphorylation.

## 329 4 Discussion

330 In this study, we have adapted a stochastic computational model to study the effect of RyR cluster  
331 organization and phosphorylation patterns on  $\text{Ca}^{2+}$  spark dynamics. Using this model, we show  
332 that fundamental features of RyR nanoclusters in a CRU, including cluster geometry, phosphory-  
333 lation pattern, and cluster integrity, interact in combination to regulate spark properties.

334 As shown in a previous computational study by Walker *et al.* (22), spark fidelity in randomly  
335 distributed non-square geometries is lower than fidelity in squared geometries. This matches with  
336 our observations regarding lower fidelity in less circular geometries, along with lower amplitudes  
337 and longer sparks. This can be understood by the fact that in a compact geometry, the RyRs  
338 are in closer proximity to other RyRs in the cluster, leading to tighter intra-cluster coupling of all  
339 RyRs within the cluster. Indeed,  $\text{Ca}^{2+}$  leaks out of the sides of the CRU geometry into the cytosol,  
340 meaning that RyRs on the outer part of the CRU geometry can experience less  $\text{Ca}^{2+}$  availability.  
341 In oblong clusters, such as the G2 geometry, these effects are amplified at the cluster ends where  
342 there are less neighbouring RyRs, leading to reduced coupling. We further observed that more  
343 dispersed CRU geometries result in decreased spark fidelity and amplitude, and increased spark  
344 duration, consistent with previous computational and experimental work (7). These results and  
345 the differences between compact and disrupted geometries match the spark property changes  
346 measured between healthy and HF patients (23).

347 Based on the redistribution of the spatial pattern observed using enhanced expansion mi-  
348 croscopy for the RyR phosphorylation site pSer2808 on Wistar rats undergoing right ventricle HF  
349 (8), we studied the effect of spatial phosphorylation pattern redistribution on multiple cluster ge-  
350 ometries. In our simulations, we observe that inner phosphorylation results in compact distribution  
351 of phosphorylated RyRs in the center of the cluster, whereas the outer and uniform patterns can  
352 be seen as disrupted phosphorylation subdomains. As seen in this work and in a previous study  
353 by Walker *et al.* (22), a compact cluster leads to higher fidelity, meaning increased likelihood for  
354 RyRs to open and release calcium. This increase in  $\text{Ca}^{2+}$  makes neighbouring RyRs more likely to  
355 open. We find that the average amplitude of the spark is significantly higher when assuming an in-  
356 ner phosphorylation pattern than when assuming a uniform distribution or an outer phosphorylation  
357 pattern because there is more consistent activation of adjacent sub clusters. This can be observed  
358 in the representative videos included in the supplemental material, where inner phosphorylation  
359 leads to an activation of both subclusters, whereas the uniform phosphorylation only activates one  
360 of the subclusters. Cluster dispersion leads to low excitability of clusters, and impaired EC cou-  
361 pling fidelity, which is a common property of failing cardiomyocytes. Phosphorylation counteracts  
362 this by sensitizing channels, increasing excitability. Our simulations show the reorganization to an  
363 inner phosphorylation pattern can further strengthen this compensatory effect.

364 The phosphorylation of the RyRs is a widely studied and controversial field, since several pa-  
365 pers show contradictory results (24). Marx *et al.* (12) report the dissociation of the FK506 binding  
366 proteins (FKBP12.6) from the RyRs after PKA phosphorylation. However, as reported by Bers  
367 (24), this finding doesn't match with experiments measured by other groups (25). In a different  
368 study Marx *et al.* report the impact of FKBP12.6 on coupled gating between neighbouring RyRs  
369 (26). Based on the results of Marx *et al.*, Sobie *et al.* (27) used a computational model to study  
370 the impact of coupled gating between RyRs on calcium sparks. Their results justify the decrease  
371 in spark fidelity by a disruption of the coupling gating between RyRs. The works of Marx *et al.* and  
372 Sobie *et al.* were carried out before super resolution imaging techniques were applied to visualize  
373 single molecule localization (e.g. individual RyRs) (5). Super resolution imaging has since proven  
374 the disruption of RyR clusters during HF (7). In a recent study from Asghari *et al.* (28), they observe  
375 that phosphorylation of the RyRs also leads to disruption of cluster geometries. In their study, the

376 disrupted geometries also show higher spark fidelity and longer full duration half maximum val-  
377 ues. These results may seem to contradict the outcomes from Kolstad *et al.* (7), where disrupted  
378 geometries lead to lower fidelities and lower amplitudes. However, in the study from Asghari *et*  
379 *al.*, healthy compact geometries are compared with phosphorylated disrupted geometries. In our  
380 study we also saw that disrupted geometries undergoing phosphorylation could lead to longer and  
381 more frequent sparks than compact geometries without phosphorylation (Figure 9). For example,  
382 G3 undergoing inner phosphorylation leads to higher fidelities and higher amplitude values than  
383 sparks generated from G1 unphosphorylated conditions. Thus, the results from this study are con-  
384 sistent with both the outcomes from Kolstad *et al.* (7), when assuming no phosphorylation, and  
385 with the results from Asghari *et al.* when comparing compact unphosphorylated geometries with  
386 dispersed phosphorylated geometries.

387 An additional controversial aspect is the impact of PKA *versus* CaMKII on  $\text{Ca}^{2+}$  spark properties.  
388 Guo *et al.* (2) studied the effect of CaMKII on  $\text{Ca}^{2+}$  sparks in mouse ventricular myocytes. They  
389 observe an increase in  $\text{Ca}^{2+}$  spark frequency, spark duration, spatial spread, and amplitude due to  
390 CaMKII-mediated RyR phosphorylation. Furthermore, Li *et al.* (29) found that PKA increases  $\text{Ca}^{2+}$   
391 spark frequency, amplitude, duration, and width in mouse ventricular myocytes. However, they  
392 conclude that PKA mediated changes in spark dynamics may be attributable to phospholamban  
393 and its resulting effects on SERCA rather than RyR phosphorylation (29). CaMKII and PKA there-  
394 fore have different impacts on calcium sparks, although both phosphorylating proteins increase  
395 the open probability of the RyR (29). Further computational studies investigating phosphorylation  
396 patterns for CaMKII-specific sites may be of interest to determine whether distinct phosphorylation  
397 patterns occur in CaMKII-mediated phosphorylation and to understand why CaMKII and PKA show  
398 different phosphorylation effects as reported by Guo *et al.* (2) and Li *et al.*. For example, the larger  
399 size of CaMKII (56-58 kDa (30)) may hinder phosphorylation activity in the central part of the CRU  
400 in the narrow dyadic cleft, leading to an outer phosphorylation pattern.

401 In this study we reaffirm the importance of cluster geometry on  $\text{Ca}^{2+}$  spark properties. Addi-  
402 tionally, these results show the large impact that spatial phosphorylation pattern can have on  $\text{Ca}^{2+}$   
403 spark properties, leading to differences in spark fidelity, amplitude or duration depending on the  
404 pattern. Thus, it is necessary to conduct further imaging studies based on the spatial distribution of  
405 the phosphorylated RyRs as shown in (8) and on the relation between cluster geometry and phos-  
406 phorylation during HF (7, 28). Differences in cluster geometry and spatial phosphorylation patterns  
407 could potentially explain the conflicting results from different studies on the impact of phosphoryla-  
408 tion proteins on  $\text{Ca}^{2+}$  sparks (24), but also emphasize the need for future investigation of the role  
409 of PKA and CAMKII phosphorylation of RyRs during health and disease.

## 410 5 Acknowledgements

411 MHM and KJM are supported by the Simula-UCSD-University of Oslo Research and PhD training  
412 (SUURPh) program, an international collaboration in computational biology and medicine funded  
413 by the Norwegian Ministry of Education and Research. P.R. would like to acknowledge support of  
414 this work by the Wu Tsai Human Performance Alliance and the Joe and Clara Tsai Foundation.  
415 This work used computational resources on the Oakforest-PACS supercomputer system provided  
416 by The University of Tokyo through Joint Usage/Research Center for Interdisciplinary Large-scale  
417 Information Infrastructures and High Performance Computing Infrastructure in Japan (Project IDs:  
418 JHPCN-jh180024).

## References

- 419 1. D. M. Bers, Cardiac excitation-contraction coupling. *Nature* **415**, 198–205, DOI 10.1038/415198a (2002).
- 420 2. T. Guo, T. Zhang, R. Mestral, D. M. Bers, Ca<sup>2+</sup>/calmodulin-dependent protein kinase II phospho-  
421 rylation of ryanodine receptor does affect calcium sparks in mouse ventricular myocytes. *Circulation research* **99**, 398–406, DOI 10.1161/01.RES.0000236756.06252.13 (2006).
- 422 3. S. Marx *et al.*, Coupled gating between individual cardiac ryanodine calcium release chan-  
423 nels. *General Physiology and Biophysics* **21**, 73–84, DOI 10.1161/hh1101.091268 (2001).
- 424 4. N. Macquaide *et al.*, Ryanodine receptor cluster fragmentation and redistribution in persistent  
425 atrial fibrillation enhance calcium release. *Cardiovascular Research* **108**, 387–398, DOI 10.  
426 1093/cvr/cvv231 (2015).
- 427 5. D. Baddeley *et al.*, Optical single-channel resolution imaging of the ryanodine receptor dis-  
428 tribution in rat cardiac myocytes. *Proceedings of the National Academy of Sciences of the*  
429 *United States of America* **106**, 22275–22280, DOI 10.1073/pnas.0908971106 (2009).
- 430 6. X. Shen *et al.*, 3D dSTORM imaging reveals novel detail of ryanodine receptor localization in  
431 rat cardiac myocytes. *Journal of Physiology* **597**, 399–418, DOI 10.1113/JP277360 (2019).
- 432 7. T. R. Kolstad *et al.*, Ryanodine receptor dispersion disrupts Ca<sup>2+</sup> release in failing cardiac  
433 myocytes. *eLife* **7**, 1–24, DOI 10.7554/eLife.39427 (2018).
- 434 8. T. M. Sheard *et al.*, Three-dimensional and chemical mapping of intracellular signaling nan-  
435 odomains in health and disease with enhanced expansion microscopy. *ACS Nano* **13**, 2143–  
436 2157, DOI 10.1021/acsnano.8b08742 (2019).
- 437 9. P. P. Jones, N. MacQuaide, W. E. Louch, Dyadic Plasticity in Cardiomyocytes. *Frontiers in*  
438 *Physiology* **9**, 1–14, DOI 10.3389/fphys.2018.01773 (2018).
- 439 10. W. E. Louch *et al.*, Slow Ca<sup>2+</sup> sparks de-synchronize Ca<sup>2+</sup> release in failing cardiomyocytes:  
440 Evidence for altered configuration of Ca<sup>2+</sup> release units? *Journal of Molecular and Cellular*  
441 *Cardiology* **58**, 41–52, DOI 10.1016/j.yjmcc.2013.01.014 (2013).
- 442 11. K. J. McCabe, P. Rangamani, Computational modeling approaches to cAMP/PKA signaling  
443 in cardiomyocytes. *Journal of Molecular and Cellular Cardiology* **154**, 32–40, DOI 10.1016/  
444 j.yjmcc.2021.01.008 (2021).
- 445 12. S. O. Marx *et al.*, PKA phosphorylation dissociates FKBP12.6 from the calcium release chan-  
446 nel (ryanodine receptor): Defective regulation in failing hearts. *Cell* **101**, 365–376, DOI 10.  
447 1016/s0092-8674(00)80847-8 (2000).
- 448 13. S. Reiken *et al.*, Protein kinase A phosphorylation of the cardiac calcium release channel  
449 (ryanodine receptor) in normal and failing hearts: Role of phosphatases and response to  
450 isoproterenol. *Journal of Biological Chemistry* **278**, 444–453, DOI 10.1074/jbc.M207028200  
451 (2003).
- 452 14. J. J. Saucerman, D. M. Bers, Calmodulin mediates differential sensitivity of CaMKII and cal-  
453 cineurin to local Ca<sup>2+</sup> in cardiac myocytes. *Biophysical Journal* **95**, 4597–4612, DOI 10.  
454 1529/biophysj.108.128728 (2008).
- 455 15. J. Heijman, P. G. Volders, R. L. Westra, Y. Rudy, Local control of  $\beta$ -adrenergic stimulation:  
456 Effects on ventricular myocyte electrophysiology and Ca<sup>2+</sup>-transient. *Journal of Molecular*  
457 *and Cellular Cardiology* **50**, 863–871, DOI 10.1016/j.yjmcc.2011.02.007 (2011).
- 458  
459  
460

- 461 16. S. Morotti, A. G. Edwards, A. D. McCulloch, D. M. Bers, E. Grandi, A novel computational  
462 model of mouse myocyte electrophysiology to assess the synergy between Na<sup>+</sup> loading and  
463 CaMKII. *Journal of Physiology* **592**, 1181–1197, DOI 10.1113/jphysiol.2013.266676  
464 (2014).
- 465 17. J. Hake *et al.*, Modelling cardiac calcium sparks in a three-dimensional reconstruction of a  
466 calcium release unit. *Journal of Physiology* **590**, 4403–4422, DOI 10.1113/jphysiol.2012.  
467 227926 (2012).
- 468 18. M. B. Cannell, C. H. Kong, M. S. Imtiaz, D. R. Laver, Control of sarcoplasmic reticulum Ca<sup>2+</sup>  
469 release by stochastic RyR gating within a 3D model of the cardiac dyad and importance of  
470 induction decay for CICR termination. *Biophysical Journal* **104**, 2149–2159, DOI 10.1016/  
471 j.bpj.2013.03.058 (2013).
- 472 19. K. Tran, N. P. Smith, D. S. Loiselle, E. J. Crampin, A thermodynamic model of the cardiac  
473 sarcoplasmic/endoplasmic Ca<sup>2+</sup> (SERCA) pump. *Biophysical Journal* **96**, 2029–2042, DOI  
474 10.1016/j.bpj.2008.11.045 (2009).
- 475 20. S. Wold, K. Esbensen, P. Geladi, Principal component analysis. *Chemometrics and intelligent*  
476 *laboratory systems* **2**, 37–52, DOI 10.1016/0169-7439(87)80084-9 (1987).
- 477 21. L. D. Brown, T. T. Cai, A. DasGupta, Interval estimation for a binomial proportion. *Statistical*  
478 *science* **16**, 101–133, DOI 10.1214/ss/1009213286 (2001).
- 479 22. M. A. Walker *et al.*, Superresolution modeling of calcium release in the heart. *Biophysical*  
480 *Journal* **107**, 3018–3029, DOI 10.1016/j.bpj.2014.11.003 (2014).
- 481 23. M. Lindner *et al.*, Calcium sparks in human ventricular cardiomyocytes from patients with  
482 terminal heart failure. *Cell Calcium* **31**, 175–182, DOI 10.1054/ceca.2002.0272 (2002).
- 483 24. D. M. Bers, Ryanodine receptor S2808 phosphorylation in heart failure: Smoking gun or red  
484 herring. *Circulation Research* **110**, 796–799, DOI 10.1161/CIRCRESAHA.112.265579 (2012).
- 485 25. T. Guo *et al.*, Kinetics of FKBP12.6 binding to ryanodine receptors in permeabilized cardiac  
486 myocytes and effects on Ca sparks. *Circulation Research* **106**, 1743–1752, DOI 10.1161/  
487 CIRCRESAHA.110.219816 (2010).
- 488 26. S. O. Marx *et al.*, Coupled gating between individual skeletal muscle Ca<sup>2+</sup> release channels  
489 (ryanodine receptors). *American Association for the Advancement of Science* **281**, 818–821,  
490 DOI 10.1126/science.281.5378.818 (1998).
- 491 27. E. A. Sobie *et al.*, The Ca<sup>2+</sup> leak paradox and “rogue ryanodine receptors”: SR Ca<sup>2+</sup> efflux  
492 theory and practice. *Progress in Biophysics and Molecular Biology* **90**, 172–185, DOI 10.  
493 1016/j.pbiomolbio.2005.06.010 (2006).
- 494 28. P. Asghari *et al.*, Cardiac ryanodine receptor distribution is dynamic and changed by auxil-  
495 iary proteins and post-translational modification. *eLife* **9**, 1–25, DOI 10.7554/eLife.51602  
496 (2020).
- 497 29. Y. Li, E. G. Kranias, G. A. Mignery, D. M. Bers, Protein kinase A phosphorylation of the  
498 ryanodine receptor does not affect calcium sparks in mouse ventricular myocytes. *Circulation*  
499 *research* **90**, 309–316, DOI 10.1161/hh0302.105660 (2002).
- 500 30. T. Zhang *et al.*, The  $\delta_c$  isoform of CaMKII is activated in cardiac hypertrophy and induces  
501 dilated cardiomyopathy and heart failure. *Circulation Research* **92**, 912–919, DOI 10.1161/  
502 01.RES.0000069686.31472.C5 (2003).



## 503 6 Supplemental material

|               | $\sigma[\mu\text{m}^2/\text{s}]$ | $B_{tot}[\mu\text{M}]$ | $k_{on}[\text{ms}^{-1}\mu\text{M}^{-1}]$ | $k_{off}[\text{ms}^{-1}]$ |
|---------------|----------------------------------|------------------------|------------------------------------------|---------------------------|
| Calmodulin    | 22                               | 24                     | 0.034                                    | 0.238                     |
| ATP           | 140                              | 455                    | 0.255                                    | 45                        |
| Fluo-4        | 20                               | 50                     | 0.08                                     | 0.09                      |
| Troponin      | 0                                | 70                     | 0.0327                                   | 0.0196                    |
| Calsequestrin | 0                                | 16000                  | 0.102                                    | 65                        |

**Table 1:** Buffer parameters.

|   | $k_{min}[\text{ms}^{-1}]$ | $k_{max}[\text{ms}^{-1}]$ | $K_{RyR}^+[\mu\text{M}]$ | $K_{pRyR}^+$ | $n$  |
|---|---------------------------|---------------------------|--------------------------|--------------|------|
| + | $5 \times 10^{-6}$        | 0.9                       | 55                       | 25           | 2.7  |
| - | 0.9                       | 3                         | 35                       | 35           | -0.5 |

**Table 2:** RyR and pRyR Model parameters.

|               | G1                   | G2                   | G3                   | G4                   | G5                   |
|---------------|----------------------|----------------------|----------------------|----------------------|----------------------|
| jSR/nSR ratio | 26.19%               | 27.53%               | 29.67%               | 32.37%               | 40.48%               |
| SERCA surface | $4.54 \mu\text{m}^2$ | $4.55 \mu\text{m}^2$ | $4.57 \mu\text{m}^2$ | $4.62 \mu\text{m}^2$ | $4.84 \mu\text{m}^2$ |

**Table 3:** SR ratio and SERCA surface for the different geometries.

504 **Movie 1:** Simulation movie for G2, uniform phosphorylation.

505

506 **Movie 2:** Simulation movie for G2, inner phosphorylation.

507

508 **Movie 3:** Simulation movie for G2, outer phosphorylation.

509

510 **Movie 4:** Simulation movie for G3, uniform phosphorylation.

511

512 **Movie 5:** Simulation movie for G3, inner phosphorylation.

513

514 **Movie 6:** Simulation movie for G3, outer phosphorylation.

515

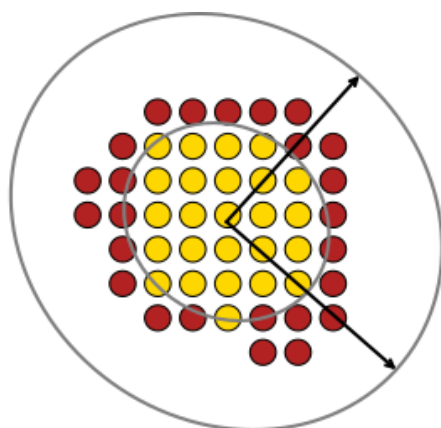

**Figure S1:** Schematic of the PCA algorithm for estimating the inner phosphorylation pattern. The arrows are vectors showing the eigenvectors of the covariance matrix of the spatial distribution of the RyRs. A first ellipse around the eigenvectors is shown. The ellipse dimensions are decreased until the desired number of phosphorylated RyRs is reached (in this case 50%).

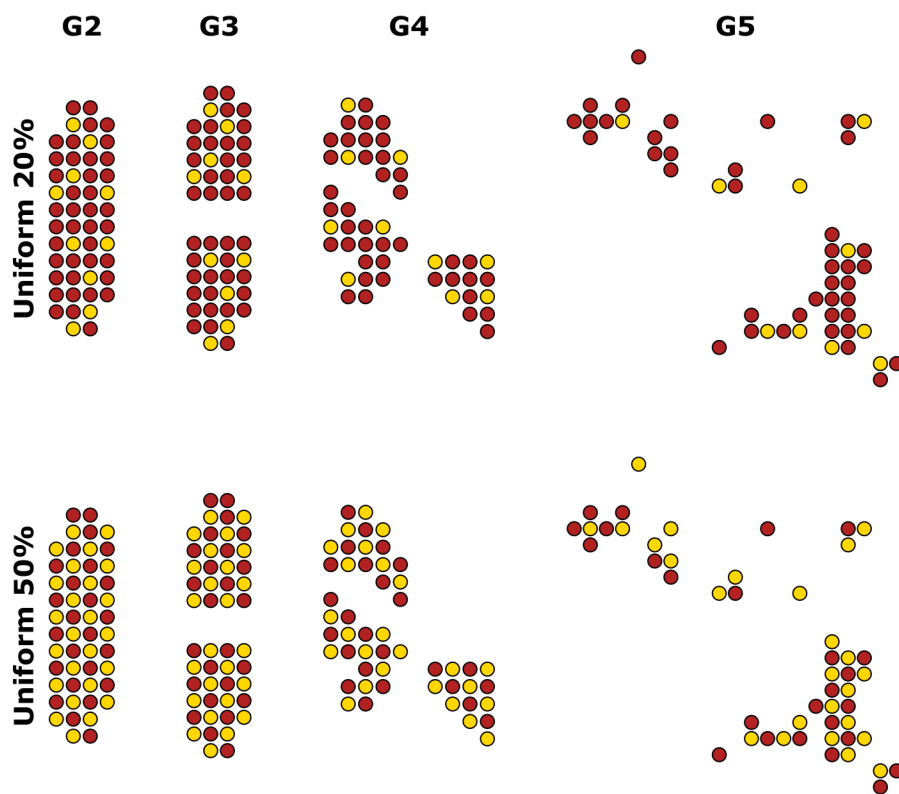

**Figure S2:** Uniform phosphorylation patterns for geometries G2-G5.

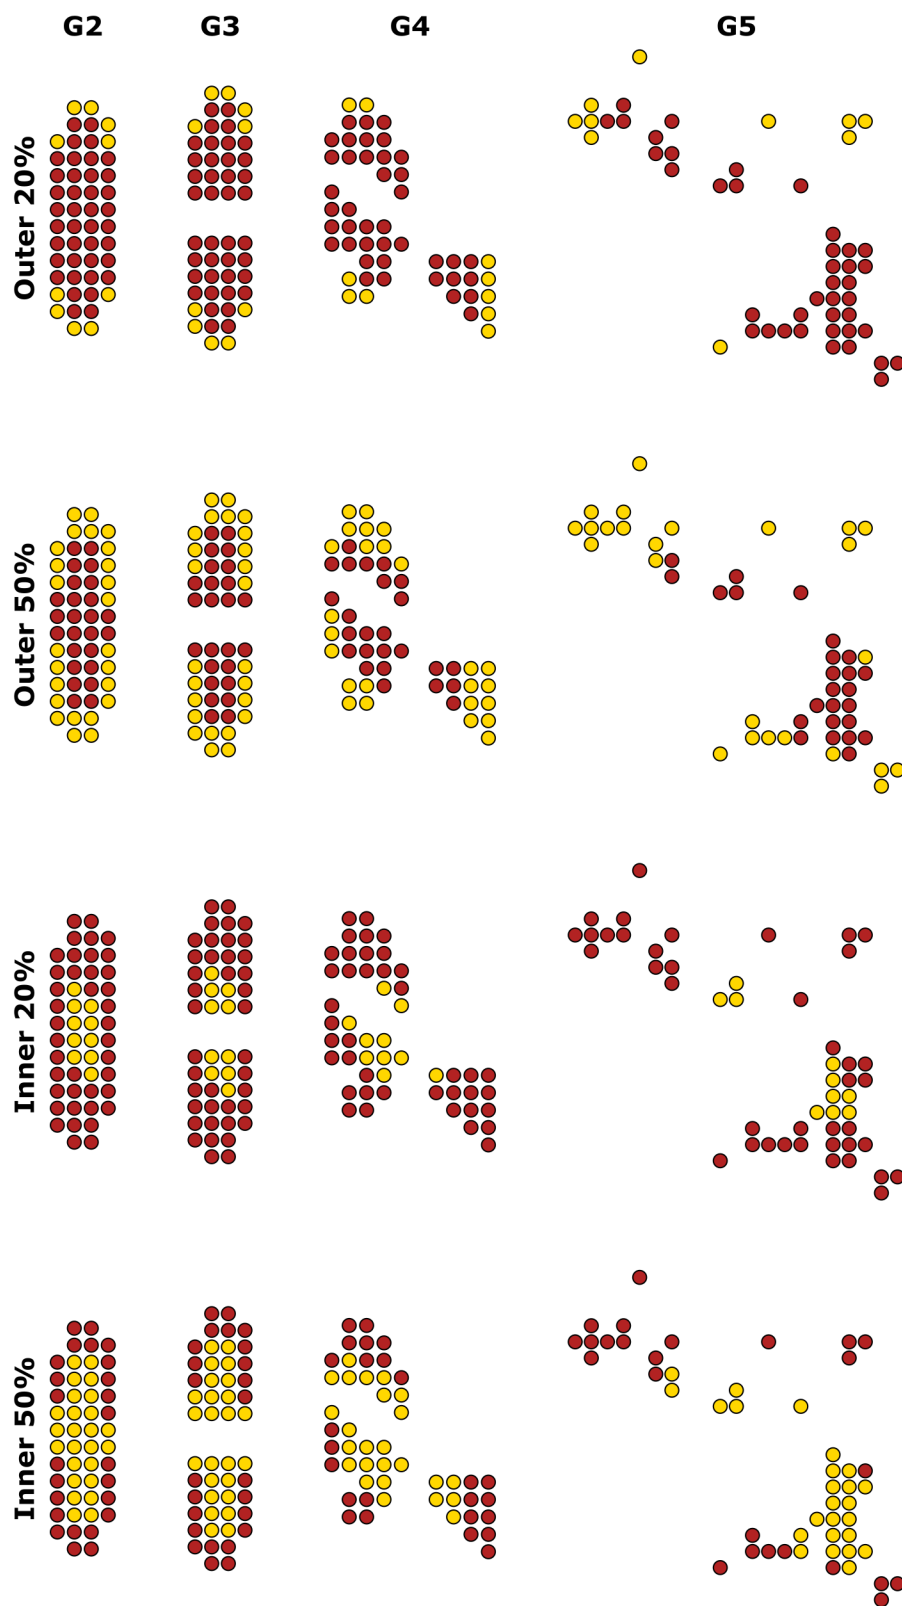

**Figure S3:** Inner and outer phosphorylation patterns for geometries G2-G5.

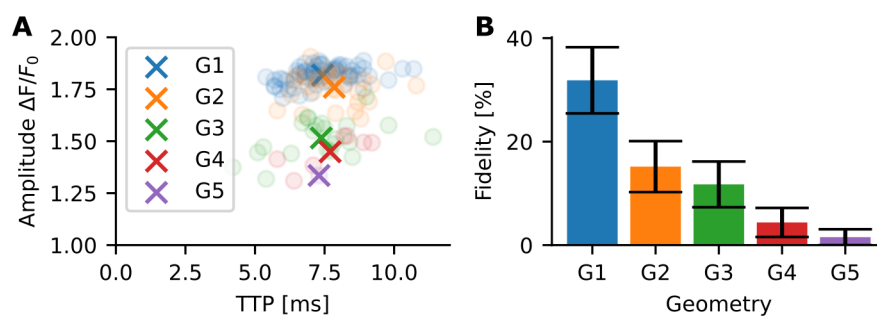

**Figure S4: Spark properties of unphosphorylated RyR for different geometries.** For each geometry 200 simulations were conducted. (A) The distribution created by the relation between TTP and amplitude is shown in a scatter plot shows. The crosses represent the mean values across all simulations. (B) The spark fidelity for each geometry is presented in a bar chart.

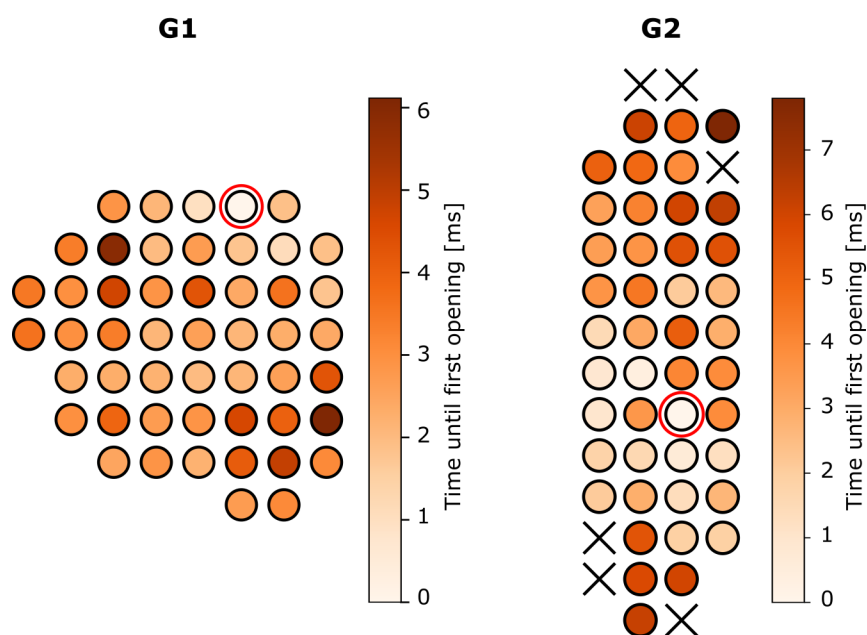

**Figure S5:** Activation map of two single simulations for G1 and G2 in the unphosphorylated state. The red circle indicates which RyR was opened to start the simulation.
